# Supplementary material for: Tuning solid emission by salts of the [Pt{4′-(o-CH3–Ph)trpy}Cl]+ and [Pt{4′-(o-CF3–Ph)trpy}Cl]+ luminophores: crystal structures of [Pt{4′-(o-CH3–Ph)trpy}Cl]A (A = BF4 or SbF6) and [Pt{4′-(o-CF3–Ph)trpy}Cl]SbF6 (trpy = 2,2′:6′,2″-terpyridine)
Source: Royal Society of Chemistry journal article supplement (doi:10.1039/b107113k), 2002-01-01
Supplement: b107113k.pdf [file b107113k.pdf]

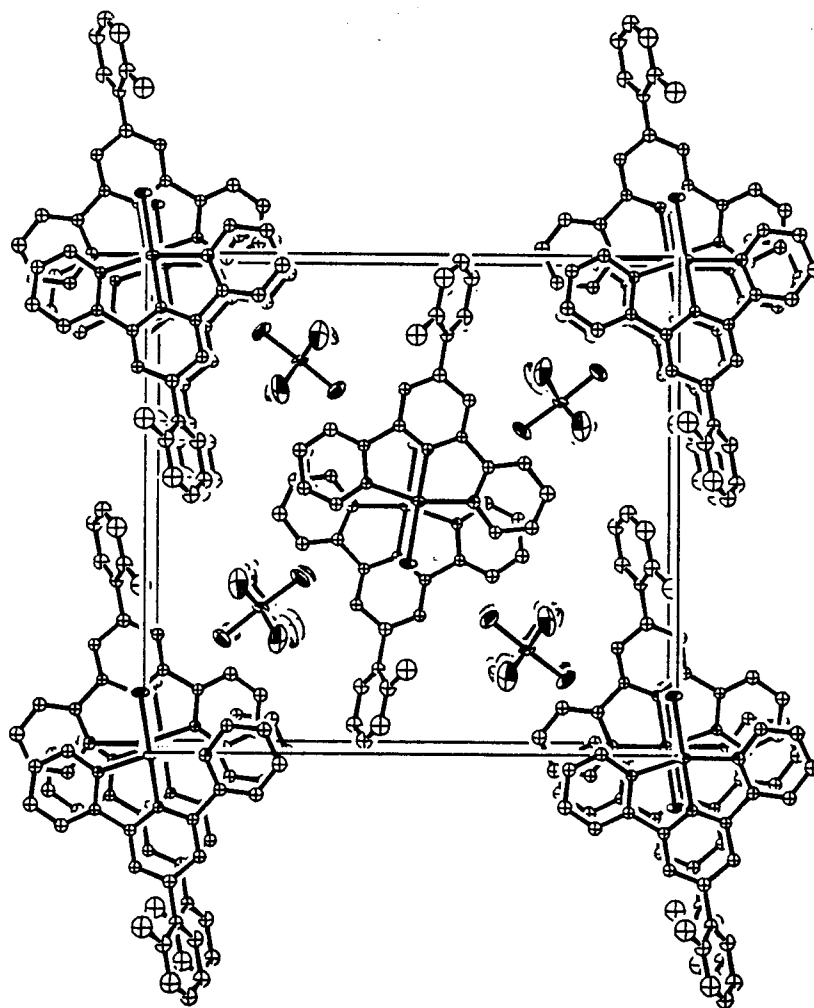

**Fig. S1.** Unit cell contents of  $[\text{Pt}\{4'(\text{o-CH}_3\text{-Ph})\text{trpy}\}\text{Cl}]\text{SbF}_6$  viewed down the  $[c]$ -axis.

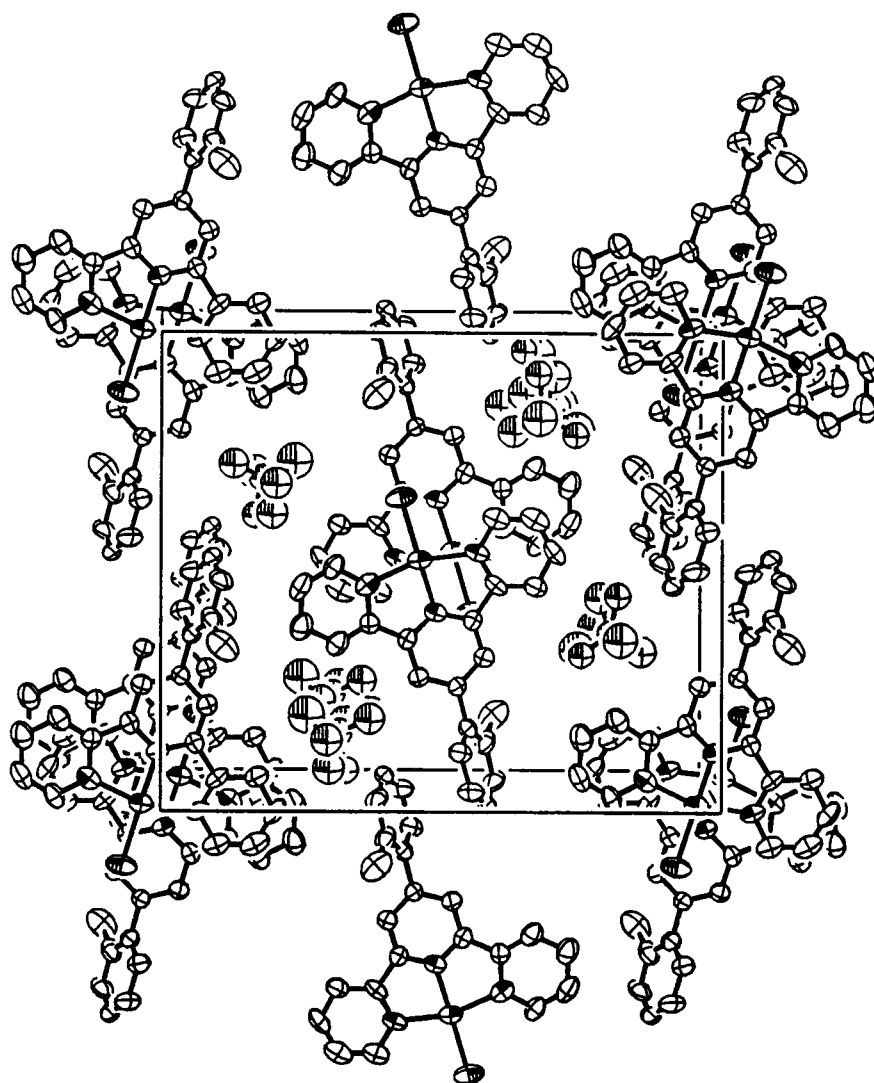

**Fig. S2.** Unit cell contents of  $[\text{Pt}\{4'-(o\text{-CH}_3\text{-Ph})\text{trpy}\}\text{Cl}]\text{BF}_4$  viewed down the  $[a]$ -axis

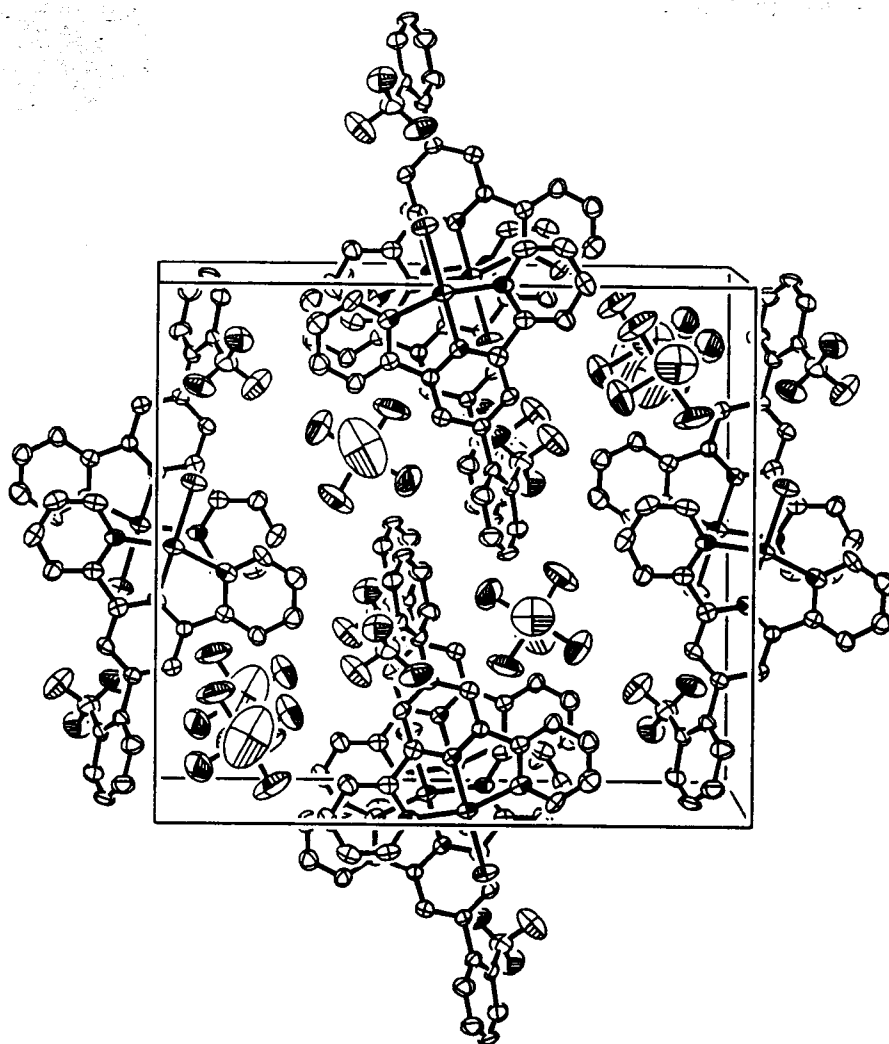

**Fig. S3.** Unit cell contents of  $[\text{Pt}\{4'(\text{o}-\text{CF}_3\text{-Ph})\text{trpy}\}\text{Cl}]\text{SbF}_6$  viewed down the  $[a]$ -axis
